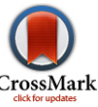

# Loss of Synaptic Connectivity, Particularly in Second Order Neurons Is a Key Feature of Diabetic Retinal Neuropathy in the $Ins2^{Akita}$ Mouse

Jose R. Hombrebueno, Mei Chen, Rosana G. Penalva, Heping Xu\*

Centre for Experimental Medicine, School of Medicine, Dentistry and Biomedical Sciences, Queen's University, Belfast, United Kingdom

## Abstract

Retinal neurodegeneration is a key component of diabetic retinopathy (DR), although the detailed neuronal damage remains ill-defined. Recent evidence suggests that in addition to amacrine and ganglion cell, diabetes may also impact on other retinal neurons. In this study, we examined retinal degenerative changes in  $Ins2^{Akita}$  diabetic mice. In scotopic electroretinograms (ERG), b-wave and oscillatory potentials were severely impaired in 9-month old  $Ins2^{Akita}$  mice. Despite no obvious pathology in fundoscopic examination, optical coherence tomography (OCT) revealed a progressive thinning of the retina from 3 months onwards. Cone but not rod photoreceptor loss was observed in 3-month-old diabetic mice. Severe impairment of synaptic connectivity at the outer plexiform layer (OPL) was detected in 9-month old  $Ins2^{Akita}$  mice. Specifically, photoreceptor presynaptic ribbons were reduced by 25% and postsynaptic boutons by 70%, although the density of horizontal, rod- and cone-bipolar cells remained similar to non-diabetic controls. Significant reductions in GABAergic and glycinergic amacrine cells and Brn3a<sup>+</sup> retinal ganglion cells were also observed in 9-month old  $Ins2^{Akita}$  mice. In conclusion, the  $Ins2^{Akita}$  mouse develops cone photoreceptor degeneration and the impairment of synaptic connectivity at the OPL, predominately resulting from the loss of postsynaptic terminal boutons. Our findings suggest that the  $Ins2^{Akita}$  mouse is a good model to study diabetic retinal neuropathy.

**Citation:** Hombrebueno JR, Chen M, Penalva RG, Xu H (2014) Loss of Synaptic Connectivity, Particularly in Second Order Neurons Is a Key Feature of Diabetic Retinal Neuropathy in the  $Ins2^{Akita}$  Mouse. PLoS ONE 9(5): e97970. doi:10.1371/journal.pone.0097970

**Editor:** Alan Stitt, Queen's University Belfast, United Kingdom

**Received:** February 21, 2014; **Accepted:** April 26, 2014; **Published:** May 21, 2014

**Copyright:** © 2014 Hombrebueno et al. This is an open-access article distributed under the terms of the Creative Commons Attribution License, which permits unrestricted use, distribution, and reproduction in any medium, provided the original author and source are credited.

**Funding:** This work was supported by Diabetes UK (11/0004230). The funders had no role in study design, data collection and analysis, decision to publish, or preparation of the manuscript.

**Competing Interests:** The authors have declared that no competing interests exist.

\* E-mail: heping.xu@qub.ac.uk

## Introduction

Diabetic retinopathy (DR) is a sight-threatening complication of diabetes and the leading cause of blindness in working populations [1]. Neural retinal degeneration together with microvascular dysfunction, constitute the key pathologies of DR [2,3]. Vascular complications (i.e. diabetic retinal vasculopathy) comprise a well-defined set of changes, which progress from capillary degeneration and vascular leakage in non-proliferative DR to retinal neovascularization in proliferative DR [4,5]. Features of diabetic retinal vasculopathy including microaneurysms, intraretinal hemorrhages and neovascularization are readily detectable in fundus examination. Visual impairment in DR is often associated with vascular dysfunction (macular oedema, vitreous hemorrhage or tractional retinal detachment). As a result, DR-related vasculopathy has been researched extensively. Although diabetes related retinal neural degeneration (diabetic retinal neuropathy) has been recognized for over five decades [6,7], the detailed neural pathology remains ill-defined. With advancements in the management of diabetic macular oedema and proliferative DR, further vision improvement will rely upon the development of neuroprotective strategies. From this perspective, a clearer understanding of how the neurosensory retina is affected under diabetic conditions will be crucial.

Diabetic retinal neuropathy has been investigated in humans and various animal models. The majority of studies have reported

a progressive loss of inner retinal neurons, including amacrine and retinal ganglion cells (RGCs) [8]. This degeneration is likely to be responsible for the early electrophysiological deficits in DR [9,10]. A growing body of evidence suggests that neuropathy in DR may also involve other neural elements. For example, impairment in colour vision (in particular blue-sensitive defects) and decreased contrast sensitivity constitute an early feature characterizing visual dysfunction in DR [11,12]. Studies in animal models have revealed some cellular components of diabetic retinal neuropathy. In diabetic rodents for example, photoreceptor death [13,14], reduced expression of presynaptic photoreceptor proteins [15], abnormalities in horizontal and bipolar cell synaptic terminals [13,16] and dendritic remodeling of RGCs [17] were observed.

In the present study, we characterized retinal neuropathy at different stages of disease in the  $Ins2^{Akita}$  mouse (model of type-1 diabetes). Previous studies have shown that  $Ins2^{Akita}$  mice develop various early DR-related retinal abnormalities, including increased vascular permeability, RGCs apoptosis, reduced retinal thickness [18,19] and abnormal electroretinographic responses [20]. We found that the  $Ins2^{Akita}$  mouse presents a variety of retinal neuropathic lesions including the degeneration of cone photoreceptors after a relatively short disease duration (3-month old), and loss of synaptic structures in second order neurons and reduced number of amacrine cells and RGCs at the later stages of the disease (9-month old).

## Materials and Methods

### Animals

Male heterozygous Ins2<sup>Akita</sup> mice (Originally purchased from Jackson Laboratory, Bar Harbor, USA, stock number 003548) of C57BL/6J background and age-matched non-diabetic siblings were used in the study. The Ins2<sup>Akita</sup> mouse develops robust hyperglycemia by 4.5 weeks of age [21]. Only males were used in this study. Experimental mice were generated by mating Ins2<sup>Akita</sup> heterozygous males with C57BL/6J females, and diabetes confirmed in 6-week old littermates by blood glucose measurement (>250 mg/dl; the majority of Ins2<sup>Akita</sup> mice had  $\geq 540$  mg/dl – above the maximal detectable level of the glucometer; non diabetic siblings had  $151 \pm 19.8$  mg/dl). All mice were housed in standard pathogen-free animal housing rooms with 12/12-hour light/dark cycle and free access to food and water. All procedures were conducted under the regulation of the UK Home Office Animals (Scientific Procedures) Act 1986 and approved by the Ethical Review Committee of Queen's University Belfast (Project Licence Number: PPL 2664). The study was conducted in compliance with the Association for Research in Vision & Ophthalmology Statement for the Use of Animals in Ophthalmology and Vision Research.

### Electroretinography

Scotopic electroretinogram (ERG) responses were evaluated in Ins2<sup>Akita</sup> and control mice at 3, 6 and 9 months of age ( $n = 6$  mice per strain/age). Mice were dark-adapted overnight and all procedures were conducted under dim-red light (<1 Lux). Briefly, mice were anesthetized with an intraperitoneal injection of ketamine hydrochloride (60 mg/kg; Fort George Animal Centre, Southampton, UK) and xylazine (5 mg/kg; Pharmacia & Veterinary Products, Kiel, Germany) and pupils dilated using 1% tropicamide and 2.5% phenylephrine (Chauvin, Essex, UK). The head was secured with a stereotaxic frame and the body temperature maintained with a homeothermic pad at 38°C (Kobayashi Healthcare, London, UK). ERG was recorded using mouse corneal ERG electrodes in response to single white light flash, delivered by a standard Ganzfeld Stimulator (LKC Technologies, Gaithersburg, MD, USA). ERG signals were bandpass filtered between 0.3–500 Hz (without notch filtering), amplified 500-fold and digitized at 2 kHz by using the CMGS-1 electrophysiology system (LKC Technologies). For each animal, 8 light intensities were used, ranging from  $0.008 \text{ cd}\cdot\text{s}/\text{m}^2$  to  $25 \text{ cd}\cdot\text{s}/\text{m}^2$ . ERG signals were averaged from 5 responses at each intensity level, with an inter-stimulus interval of 10 seconds ( $0.008$ ,  $0.025 \text{ cd}\cdot\text{s}/\text{m}^2$ ), 15 seconds ( $0.08$ ,  $0.25$ ,  $0.8 \text{ cd}\cdot\text{s}/\text{m}^2$ ) or 30 seconds ( $2.5$ ,  $8$ ,  $25 \text{ cd}\cdot\text{s}/\text{m}^2$ ). Oscillatory potentials (OPs) were obtained by a low band filtering at 75 Hz and recorded using  $25 \text{ cd}\cdot\text{s}/\text{m}^2$  flash intensity. The following ERG parameters were measured: a-wave amplitude (baseline to negative a-wave peak), b-wave amplitude (a-wave peak to positive b-wave peak), a-wave implicit time (from stimulus onset to negative a-wave peak), b-wave implicit time (from stimulus onset to positive b-wave peak), OPs amplitude (the summed amplitude of wavelets 2–5) and OPs implicit time (the summed implicit times of wavelets 2–5). The b/a-wave amplitude ratio was calculated at the highest flash intensities (0.8, 2.5, 8,  $25 \text{ cd}\cdot\text{s}/\text{m}^2$ ).

Photopic ERG responses were also evaluated in Ins2<sup>Akita</sup> and control mice at 3 and 9 months of age ( $n = 5$  mice per strain/age). Three light intensities ( $2.5$ ,  $8$  and  $25 \text{ cd}\cdot\text{s}/\text{m}^2$ ) were used to stimulate the light-adapted mice (on a  $30 \text{ cd}\cdot\text{s}/\text{m}^2$  background light). The amplitude and implicit time of the photopic b-wave were averaged from 5 responses at each light intensity level.

### Clinical investigations

Animals were anesthetized by isoflurane inhalation (Merial; Animal Health Ltd.; Essex, UK) and pupils dilated as described above. A topic endoscopic fundus imaging system was used to obtain fundus images as described previously [22,23]. Spectral Domain Optical Coherence Tomography (SD-OCT) was conducted using the Spectralis Heidelberg OCT system (Heidelberg Engineering, Heidelberg, Germany).

### Retinal thickness analysis

Retinal thickness was measured in Ins2<sup>Akita</sup> and control mice at 3, 6 and 9 months of age ( $n = 6$  animals per strain/age) from the SD-OCT images. Three types of measures were conducted: 1) total retinal thickness: from the nerve fibre layer (NFL) to the out margin of photoreceptor outer segments (OS); 2) inner retinal thickness: from the NFL to the margin between the inner nuclear layer (INL) and outer plexiform layer (OPL); 3) outer retinal thickness: from the INL/OPL margin to the out margin of OS. The SD-OCT layers were defined according to previous investigations in the mouse retina [24,25]. Retinal thickness was measured at 300, 600 and 900  $\mu\text{m}$  eccentricities from the optic disc (OD) in dorsal-ventral and nasal-temporal sectors. Isodensity maps of average retinal thickness were constructed using Sigma Plot v12.0 (Systat Software, London, UK).

### Immunohistochemistry

Mice were sacrificed by CO<sub>2</sub> inhalation and eyes dissected and fixed in 2% paraformaldehyde for 2 h. Eyes were then processed for immunohistochemistry as previously described [26,27]. Briefly, 14  $\mu\text{m}$ -thick retinal cryosections were incubated overnight (4°C) with primary antibodies (Table 1) diluted in 0.5% TritonX-100 with 10% normal donkey serum in PBS. Sections were then incubated for 2 h at room temperature with appropriate fluorophore-conjugated secondary antibodies. All sections were cover-slipped with Vectashield-DAPI (Vector Labs, Burlingame, CA) and examined by confocal microscopy (C1 Nikon Eclipse TE200-U, Nikon UK Ltd, Surrey, UK).

### Retinal morphometry

Confocal images were used to quantify retinal neurons and synaptic structures in Ins2<sup>Akita</sup> and control mice at 3, 6 and 9 months of age ( $n = 3$  animals per strain/age). Data was acquired from 3 sections per eye at the same retinal eccentricities (0.6, 1.2 and 1.8 mm from the OD). Confocal settings remained unchanged in all studies during image acquisition. Images were analysed using ImageJ software (National Institutes of Health, Bethesda, MD).

Using the listed panel of antibodies we carried out the following analyses: 1) rod and cone photoreceptor density (rods estimated as the difference between DAPI<sup>+</sup> nuclei at the outer nuclear layer and the number of cone somata), 2) photoreceptor synaptic ribbon density, 3) horizontal, rod-bipolar and cone-bipolar cell density, 4) horizontal and rod-bipolar cell dendritic spines density, 5) rod- and cone-bipolar dendritic length (measured from the apical border of the cell soma), 6) rod- and cone-bipolar cell axon bouton density, 7) GABAergic and glycinergic amacrine cell density, and 8) RGCs density. At least 20 retinal images per strain/age were analyzed and values averaged and normalized to 100  $\mu\text{m}$  retinal length. The density of dendritic spines in horizontal cells was measured in 4 cells per image. The density of dendritic spines and axon boutons in rod-bipolar cells and the dendritic length of rod- or cone-bipolar cells were measured in 20 cells per image.

**Table 1.** Primary antibodies used in the study.

| Antigen                            | Antiserum                  | Dilution | Source        | Retinal localization       |
|------------------------------------|----------------------------|----------|---------------|----------------------------|
| Rhodopsin                          | mouse-rhodopsin, clone 4D2 | 1:500    | Chemicon      | Rod photoreceptors         |
| Cone arrestin                      | rabbit anti-cone arrestin  | 1:10000  | Chemicon      | Cone photoreceptors        |
| Bassoon                            | mouse anti-bassoon         | 1:400    | Enzo          | Synaptic ribbons           |
| Secretagogin                       | sheep anti-secretagogin    | 1:400    | Biovendor R&D | Cone bipolar cells         |
| PKC $\alpha$                       | rabbit anti-PKC $\alpha$   | 1:500    | Santa Cruz    | Rod bipolar cells          |
| Calbindin                          | rabbit anti-calbindin      | 1:1000   | Chemicon      | Horizontal cells           |
| $\gamma$ -aminobutyric acid (GABA) | guinea pig anti-GABA       | 1:500    | Chemicon      | GABAergic amacrine cells   |
| Glycine Transporter-1 (GlyT1)      | goat anti-glyT1            | 1:3000   | Chemicon      | Glycinergic amacrine cells |
| Brn3a                              | goat anti-Brn3a            | 1:500    | Santa Cruz    | Retinal ganglion cells     |

doi:10.1371/journal.pone.0097970.t001

**Data analysis**

ERG responses (scotopic a-wave, b-wave and photopic b-wave), and morphometry data were analysed using 2-way ANOVA (two strains of mice and different ages), followed by post-hoc Bonferroni's pairwise comparisons. OPs responses and retinal

thickness were analysed using unpaired Student's *t*-test. Data were expressed as mean  $\pm$  SEM (ERG) or  $\pm$  SD (retinal thickness, retinal morphometry).  $P < 0.05$  was considered statistically significant.

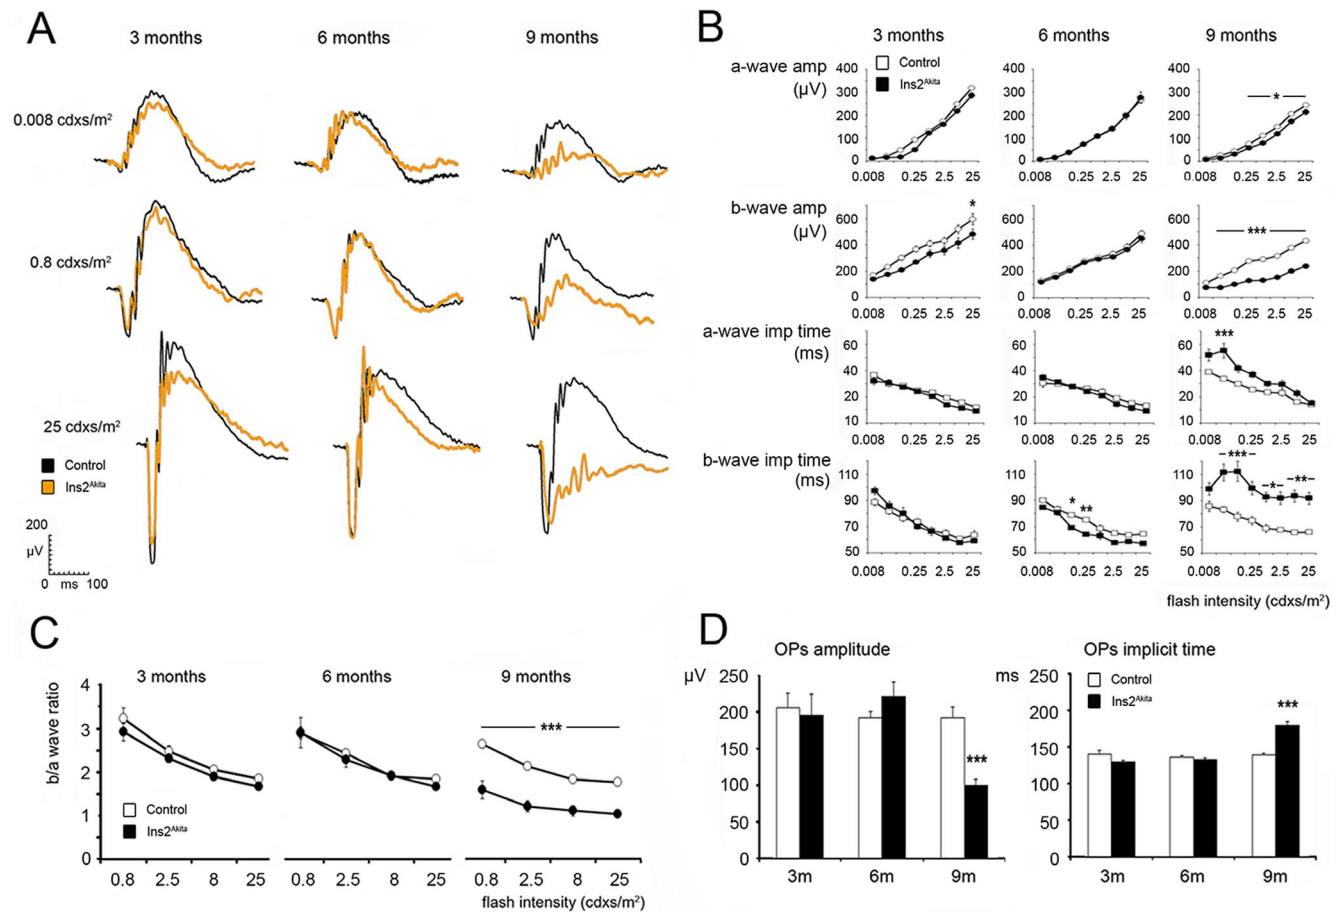

**Figure 1. Abnormal scotopic electroretinogram (ERG) responses in the *Ins2<sup>Akita</sup>* mouse.** (A) Representative scotopic ERG responses obtained from control (black) and *Ins2<sup>Akita</sup>* mice (orange) of different ages. (B) The amplitude ( $\mu$ V) and implicit time (milliseconds, ms) of the dark adapted a- and b-waves in control and *Ins2<sup>Akita</sup>* mice. (C) The b/a-wave ratio in different ages of control and *Ins2<sup>Akita</sup>* mice. (D) The amplitude and implicit time of oscillatory potentials in control and *Ins2<sup>Akita</sup>* mice. (B-D)  $n = 6$  mice per strain/age,  $*P < 0.05$ ,  $**P < 0.01$ ,  $***P < 0.001$ . 2-way ANOVA (a- and b-wave responses), Student's *t*-test (OPs responses). doi:10.1371/journal.pone.0097970.g001

## Results

### Abnormal ERG responses in the *Ins2<sup>Akita</sup>* mouse

Scotopic ERG analysis in 3-month old *Ins2<sup>Akita</sup>* mice showed a slight but statistically significant reduction in the b-wave amplitude in the higher flash intensity ( $25 \text{ cd}\cdot\text{s}/\text{m}^2$ ) compared to age-matched controls (Figure 1A-B). Interestingly, 6-month old *Ins2<sup>Akita</sup>* mice had significantly faster b-wave responses (0.08 and  $0.25 \text{ cd}\cdot\text{s}/\text{m}^2$ ; b-wave implicit time, Figure 1B) compared to control mice. By 9-month old, the *Ins2<sup>Akita</sup>* mouse displayed smaller amplitude and increased implicit times in both a-wave (reduced amplitude between  $0.8\text{--}25 \text{ cd}\cdot\text{s}/\text{m}^2$  flash light; increased implicit time at  $0.025 \text{ cd}\cdot\text{s}/\text{m}^2$  flash light) and b-wave (reduced amplitude between  $0.025\text{--}25 \text{ cd}\cdot\text{s}/\text{m}^2$  flash light; increased implicit time between  $0.025\text{--}25 \text{ cd}\cdot\text{s}/\text{m}^2$  responses). Further analysis using b/a-wave ratio revealed a strikingly disproportionate reduction in the b- and a-wave amplitudes ( $p < 0.001$ ; Figure 1C), suggesting that the abnormal drop in b-wave amplitude may arise from disorders at the distal retina rather than from photoreceptors.

OPs responses were evaluated to assess the functional activity of amacrine cells (Figure 1D). No changes were observed in the amplitude or implicit times of OPs by 3 months of age. An apparent increase in the OPs amplitude was evident in 6-month old *Ins2<sup>Akita</sup>* mice, but failed to reach statistical significance. Closer inspection of these traces, however, revealed an increase in the fourth OP wavelet ( $p < 0.05$ ; figure S1A). OPs implicit times appeared normal at this stage (Figure 1D). By 9-month old, OPs responses were significantly reduced and delayed in the *Ins2<sup>Akita</sup>* mouse ( $p < 0.001$ ; Figure 1D and figure S1B).

No differences were observed in the photopic b-wave amplitude between *Ins2<sup>Akita</sup>* mice and sibling controls of 3 months old (figure

S1C). However, by 9 months of age, the amplitude of the photopic b-wave was significantly reduced in  $25 \text{ cd}\cdot\text{s}/\text{m}^2$  flash light ( $p < 0.01$ ; figure S1D). The implicit time of the photopic b-wave remained similar to age-matched controls in both age groups (data not shown).

### Retinal degeneration in the *Ins2<sup>Akita</sup>* mouse

SD-OCT was carried out in 3-, 6-, and 9-month old control and *Ins2<sup>Akita</sup>* mice (Figure 2). As shown by isodensity maps, there was an age-dependent reduction in the overall retinal thickness (OS-NFL) of *Ins2<sup>Akita</sup>* mice but not age-matched controls (Figure 2B). This reduction occurred in all retinal sectors for all the eccentricities analysed (Figure 2B-C). Further analysis of outer (OS-OPL) and inner (INL-NFL) retinal thickness revealed that at 3 months of age, only the outer retina was affected in the *Ins2<sup>Akita</sup>* mouse ( $p < 0.001$ , Figure 2D). From 3–6 months, no further reduction was observed in the outer retina, but a significant reduction was detected in the inner retina ( $p < 0.001$ ). From 6–9 months, the thickness of both outer and inner retina was further reduced ( $p < 0.001$ ) compared to non-diabetic controls.

Despite a significant reduction in retinal thickness, other human DR related lesions (e.g. microaneurysm, exudates) were not detected in fundus imaging and SD-OCT investigation up to 9 months of age in *Ins2<sup>Akita</sup>* mice (Figure 2E-J).

### Characterization of diabetic retinal neuropathy in the *Ins2<sup>Akita</sup>* mouse

**Photoreceptor cells.** Rod and cone photoreceptors were evaluated by using antisera against rhodopsin and cone-arrestin respectively (Figure 3). Control and *Ins2<sup>Akita</sup>* mice showed normal expression of rhodopsin in rod outer segments up to 9 months of age (Figure 3A-F). No significant changes were observed in the

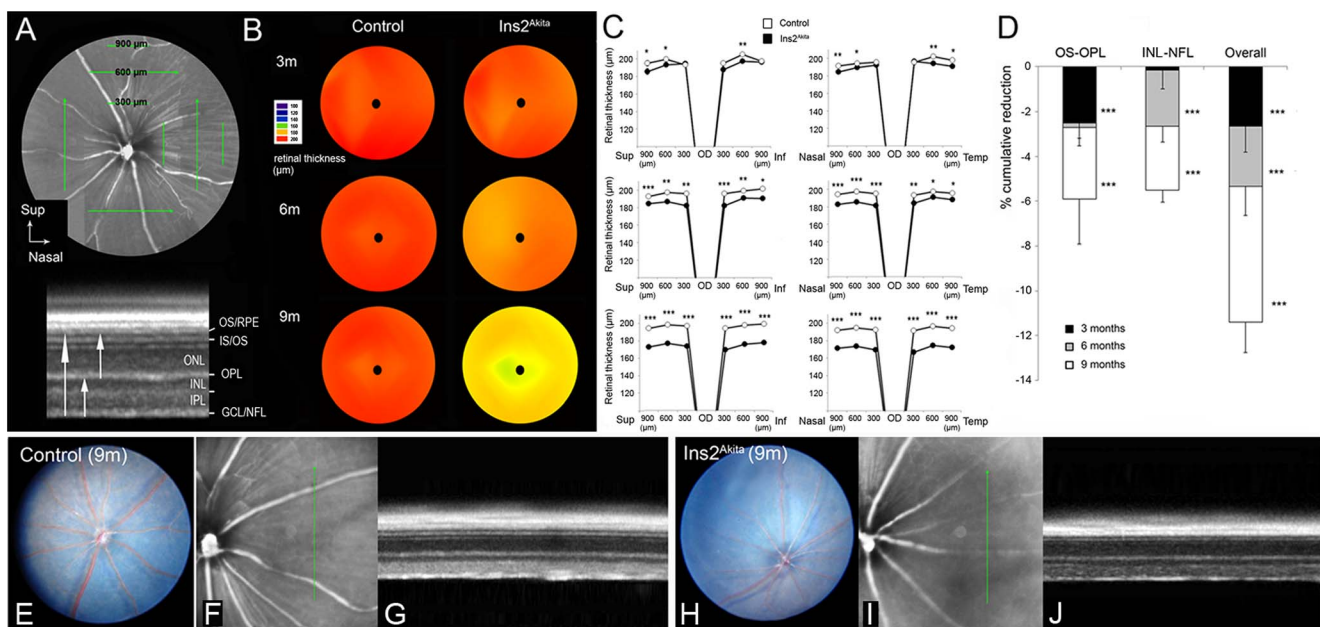

**Figure 2. Retinal degeneration in the *Ins2<sup>Akita</sup>* mouse.** (A) SD-OCT image from 9-month old control retina. Retinal thickness was measured at 300, 600 and 900  $\mu\text{m}$  eccentricities in dorso-ventral and nasal-temporal retinal regions, from NFL-OS (total retinal thickness), NFL-INL (inner retinal thickness) and OPL-OS (outer retinal thickness). Isodensity maps (B) and quantitative analysis (C) of total retinal thickness from control and *Ins2<sup>Akita</sup>* mice at different ages. (D) The cumulative reduction of outer, inner and total retinal thickness in different ages of control and *Ins2<sup>Akita</sup>* mice. Fundus (E, H) and OCT images (F-G, I-J) taken from 9-month old control (A-C) and *Ins2<sup>Akita</sup>* mice (D-F). (B-D)  $n = 6$  mice per strain/age, \* $P < 0.05$ , \*\* $P < 0.01$ , \*\*\* $P < 0.001$  compared to control mice of the same age. Student's *t*-test. RPE, retinal pigment epithelium; IS/OS, photoreceptor inner/outer segments; ONL, outer nuclear layer; OPL, outer plexiform layer; INL, inner nuclear layer; IPL, inner plexiform layer; GCL/NFL, ganglion/nerve fibre layer. doi:10.1371/journal.pone.0097970.g002

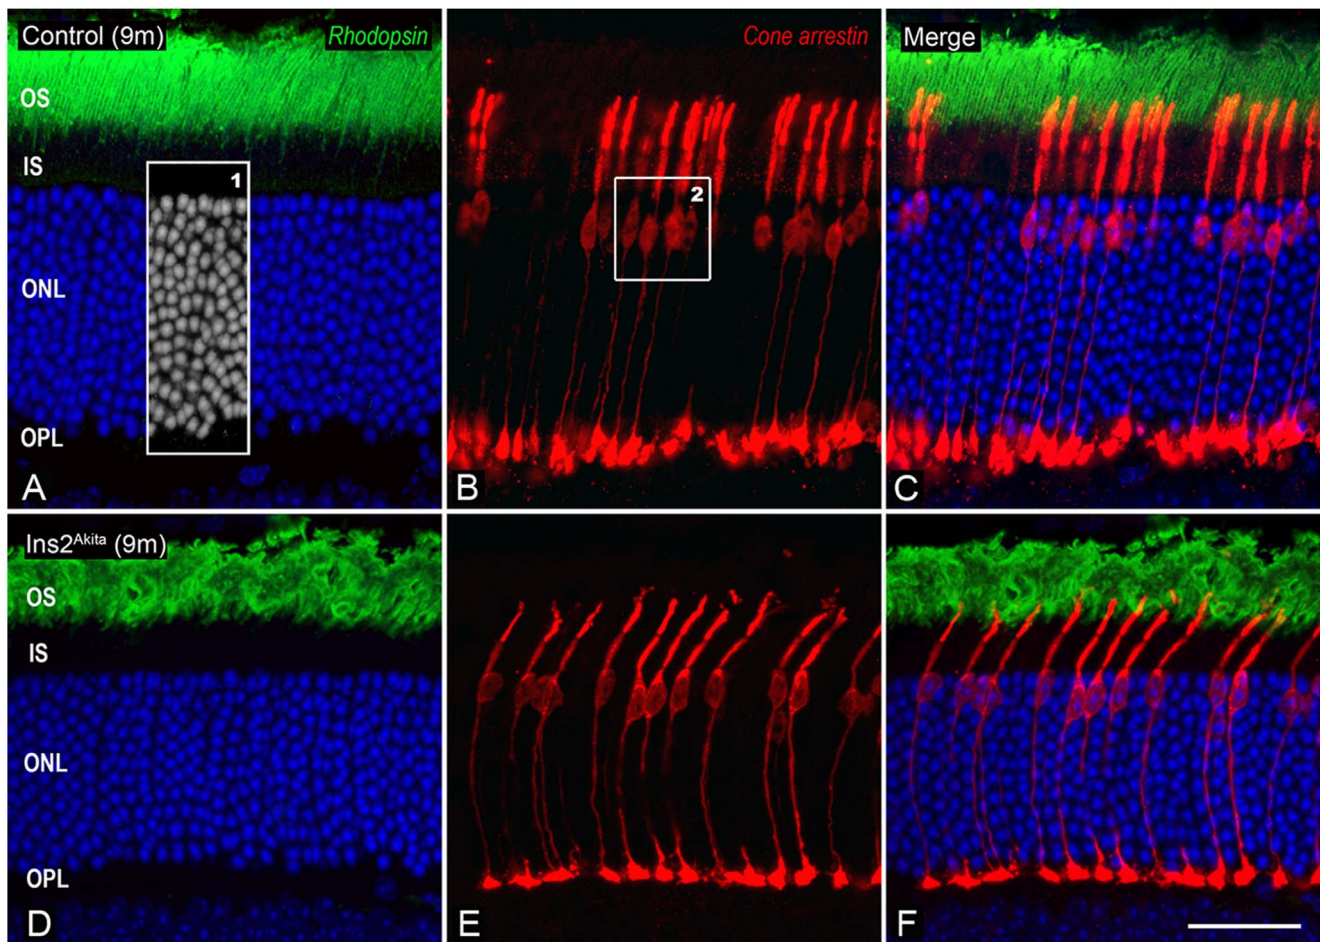

### 1. Photoreceptors (9m)

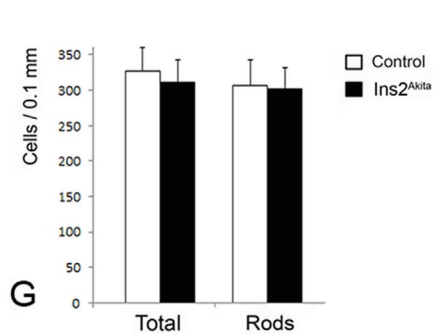

### 2. Cone photoreceptors

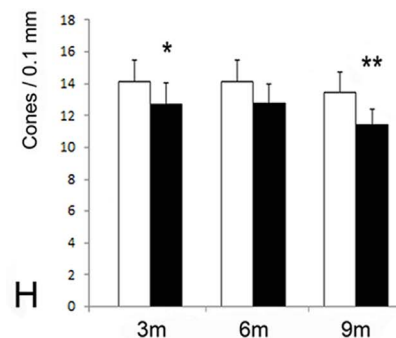

**Figure 3. Cone photoreceptor degeneration in the *Ins2<sup>Akita</sup>* mouse.** (A-F) Retinal photomicrographs of rhodopsin (green) and cone-arrestin (red) immunoreactivities in 9-month old control (A-C) and *Ins2<sup>Akita</sup>* (D-F) mice. (G-H) Cell densities of total photoreceptors (DAPI<sup>+</sup> nuclei - *box1*), cones (*box2*) and rods (difference between DAPI<sup>+</sup> nuclei and cones) in 3-, 6- and 9-month old control and *Ins2<sup>Akita</sup>* mice. (G-H)  $n \geq 20$  retinal images per strain/age, \* $P < 0.05$ , \*\* $P < 0.01$  compared to control mice of the same age. 2-way ANOVA. OS, outer segments; IS, inner segments; ONL, outer nuclear layer; OPL, outer plexiform layer. Scale bar: 30  $\mu$ m. doi:10.1371/journal.pone.0097970.g003

total number of photoreceptors and rods from 3-9 months between control and *Ins2<sup>Akita</sup>* mice (Figure 3G). Interestingly, the number of cone photoreceptors was 10% less in 3-month old *Ins2<sup>Akita</sup>* compared to age-matched controls ( $p < 0.05$ ) and further decreased by 9 months of age ( $p < 0.01$ ; Figure 3H). Thus, cone but

not rod photoreceptors selectively degenerate from an early stage in *Ins2<sup>Akita</sup>* mice.

#### Outer plexiform layer connectivity

We next investigated synaptic connectivity at the outer retina by studying pre- and post-synaptic processes at the OPL (Figure 4, 5).

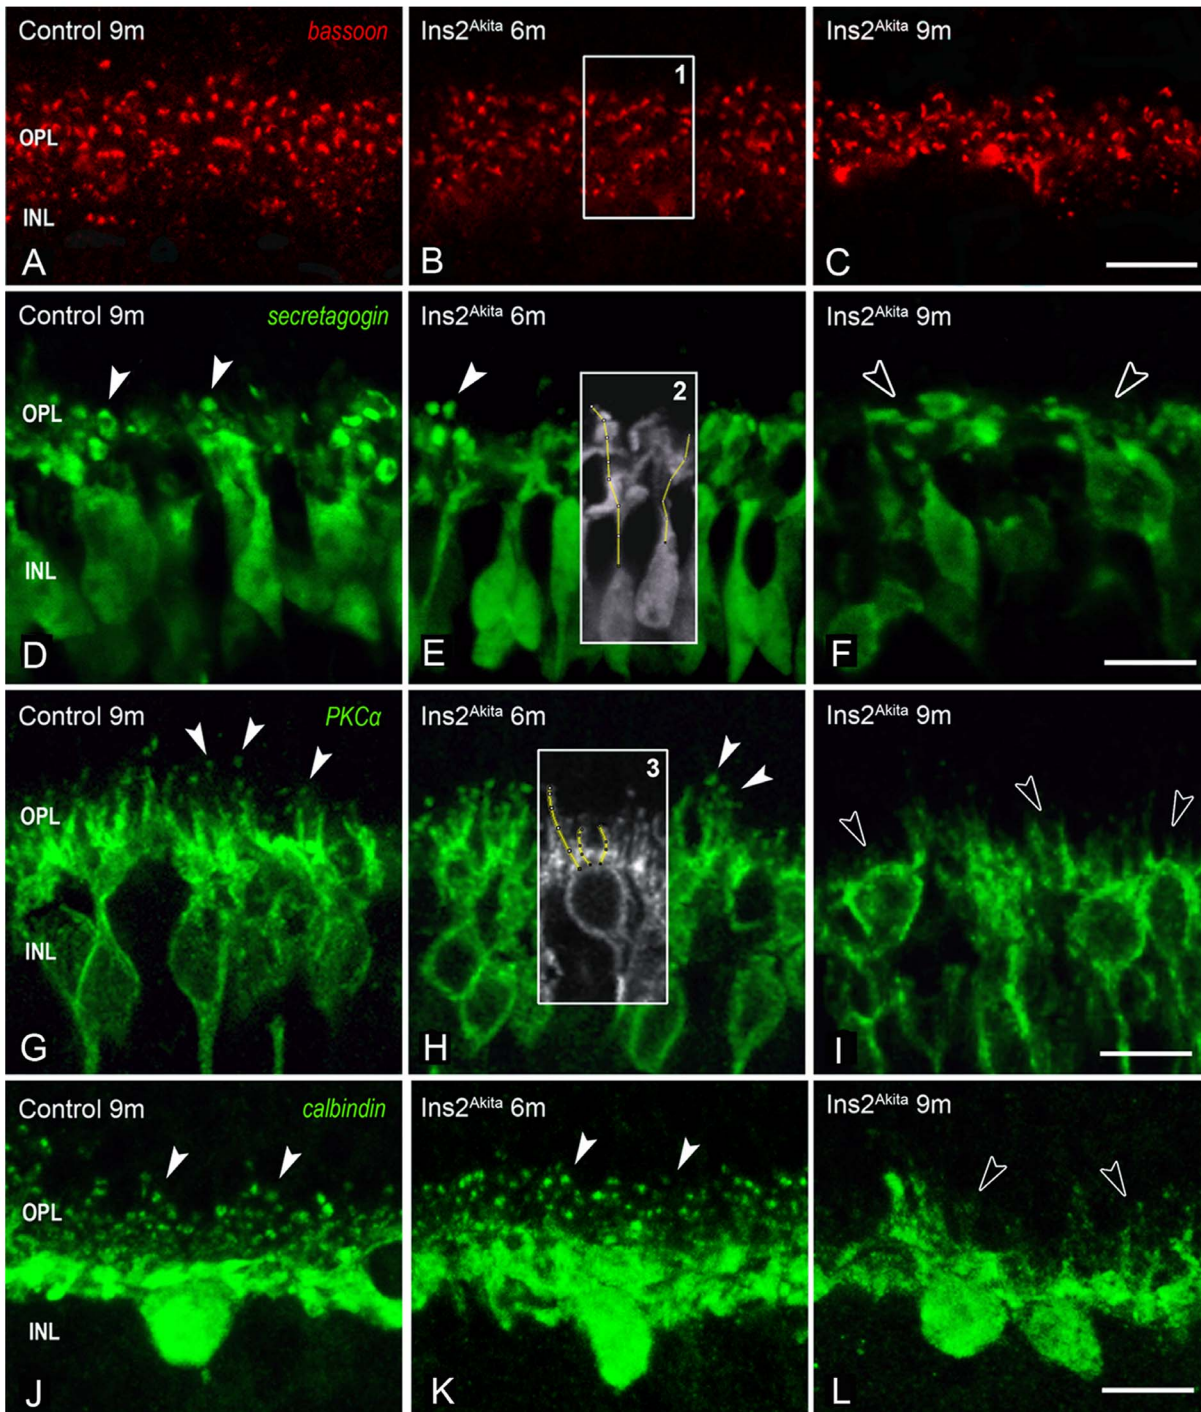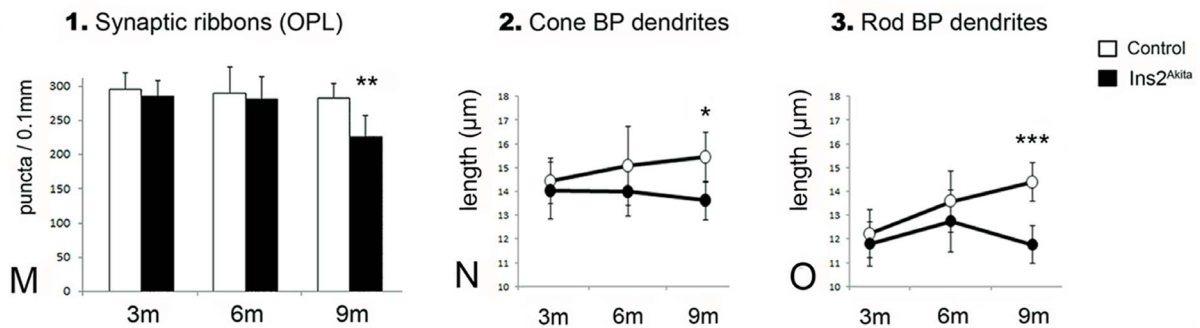

**Figure 4. Synaptic elements in the OPL of control and *Ins2<sup>Akita</sup>* mice.** (A-C) Photoreceptor synaptic ribbons immunostained with bassoon in 9-month old control and 6- and 9-month old *Ins2<sup>Akita</sup>* mice. Immunostaining of cone-bipolar (secretagogin) (D-F), rod-bipolar (PKC $\alpha$ ) (G-I) and horizontal cells (calbindin) (J-L) in 9-month old control and 6- and 9-month old *Ins2<sup>Akita</sup>* mice. Normal dendritic arbors of cone-bipolar, rod-bipolar and horizontal cells at the OPL (arrowheads). Loss of dendritic complexity in cone-bipolar, rod-bipolar and horizontal cells in 9-month old *Ins2<sup>Akita</sup>* mice (open-arrowheads). Quantitative analysis of photoreceptor synaptic ribbons (*box1*) (M) and cone-bipolar (*box2*) (N) and rod-bipolar dendritic length (*box3*) (O) in control and *Ins2<sup>Akita</sup>* mice at different ages. (M-O)  $n \geq 20$  retinal images per strain/age, \* $P < 0.05$ , \*\* $P < 0.01$ , \*\*\* $P < 0.001$ . 2-way ANOVA. OPL, outer plexiform layer; INL, inner nuclear layer. Scale bar: 10  $\mu\text{m}$ . doi:10.1371/journal.pone.0097970.g004

Immunostaining of bassoon revealed synaptic ribbons in rod and cone cell terminals (Figure 4A). Many of the presynaptic ribbons displayed a typical horseshoe-like morphology in *Ins2<sup>Akita</sup>* mice (Figure 4B-C). However, despite the absence of morphological anomalies, a 25% reduction of photoreceptor synaptic ribbons was detected in 9-month old *Ins2<sup>Akita</sup>* ( $p < 0.01$ , Figure 4M). This reduction did not correlate with a proportional loss of total photoreceptors at this stage (Figure 3G), suggesting additional damages to the photoreceptor synaptic complex.

Photoreceptor postsynaptic elements were identified by immunostaining of secretagogin (cone-bipolar cells) (Figure 4D-F), PKC $\alpha$  (rod-bipolar cells) (Figure 4G-I) and calbindin (horizontal cells) (Figure 4J-L). An age-dependent increase in the length of cone- and rod-bipolar dendritic projections (Figure 4N, 4O and figure S2) was observed in non-diabetic controls. By contrast, there was a significant reduction in the length of both cone-bipolar (15%,  $p < 0.05$ ) and rod-bipolar dendritic projections (20%,  $p < 0.001$ ) in 9-month old *Ins2<sup>Akita</sup>* mice (Figure 4N, 4O and Figure S2). The number of horizontal cell dendritic tips (postsynaptic boutons) was also reduced in this stage (Figure 4J-L).

Double immunostaining against bassoon and PKC $\alpha$  or calbindin showed the close association between photoreceptor presynaptic terminals and postsynaptic boutons of rod-bipolar or horizontal cells in control and 6-month old *Ins2<sup>Akita</sup>* mice (Figure 5A-B, 5E-F). However, the absence of paired connectivity, predominately due to a lack of dendritic boutons in second-order neurons, was observed in 9-month old *Ins2<sup>Akita</sup>* mice (Figure 5C, G).

G). Quantitative analysis revealed a 70% reduction ( $p < 0.001$ ) of both rod-bipolar (Figure 5D) and horizontal cell dendritic tips (Figure 5H) at this stage compared to age-matched controls.

### Changes in bipolar and horizontal cells

The fact that postsynaptic dendrite reduction outweighs presynaptic ribbon loss in the *Ins2<sup>Akita</sup>* mouse suggests that the impairment in OPL connectivity may result from the loss of second-order neurons. Thus, we evaluated cell densities of horizontal, cone-bipolar and rod-bipolar cells (Figure 6). Surprisingly, no differences were observed in the density of horizontal, cone-bipolar or rod-bipolar cells between *Ins2<sup>Akita</sup>* mice and controls in all age groups (Figure 6E, J). Moreover, quantitative analysis of the total number of cone-bipolar cell axon terminals (Fig. 6K-L) revealed no difference between control and *Ins2<sup>Akita</sup>* mice (data not shown). However, a progressive reduction of rod-bipolar cell axonal boutons was observed in the *Ins2<sup>Akita</sup>* mouse from 6 months onwards (Figure 6M-O; 6 months,  $p < 0.05$ ; 9 months,  $p < 0.01$ ).

### Changes in amacrine and retinal ganglion cells

To further understand retinal neuropathy in *Ins2<sup>Akita</sup>* mice, we examined amacrine cells and RGCs (Fig. 7). Amacrine cells of the INL were assessed by using antibody against GABA or GlyT1 (GABAergic or glycinergic subtypes respectively), since most amacrine cells express one of these neurotransmitters [28,29]. No differences were observed in either GABAergic or glycinergic

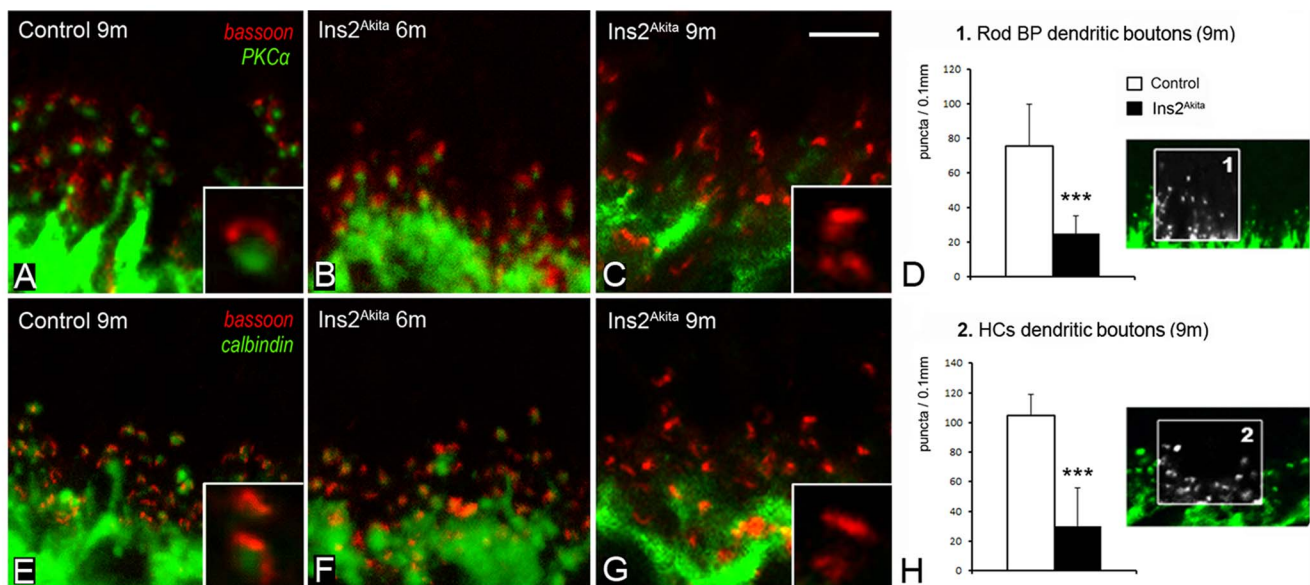

**Figure 5. Synaptic structure in the OPL of control and *Ins2<sup>Akita</sup>* mice.** Photomicrographs of retinal sections double-labelled for bassoon (red) with PKC $\alpha$  (A-C) or calbindin (E-G) in 9-month control and 6- and 9-month old *Ins2<sup>Akita</sup>* mice. Absence of paired connectivity between photoreceptor terminals and second-order neurons in 9-month old *Ins2<sup>Akita</sup>* mice (insets C, G). Quantitative analysis of rod-bipolar (*box1*) (D) and horizontal cell (*box2*) (H) dendritic boutons in control and *Ins2<sup>Akita</sup>* mice at different ages. (D-H)  $n \geq 20$  retinal images per strain/age, \*\*\* $P < 0.001$ . 2-way ANOVA. Scale bar: 10  $\mu\text{m}$ , inset 5  $\mu\text{m}$ . doi:10.1371/journal.pone.0097970.g005

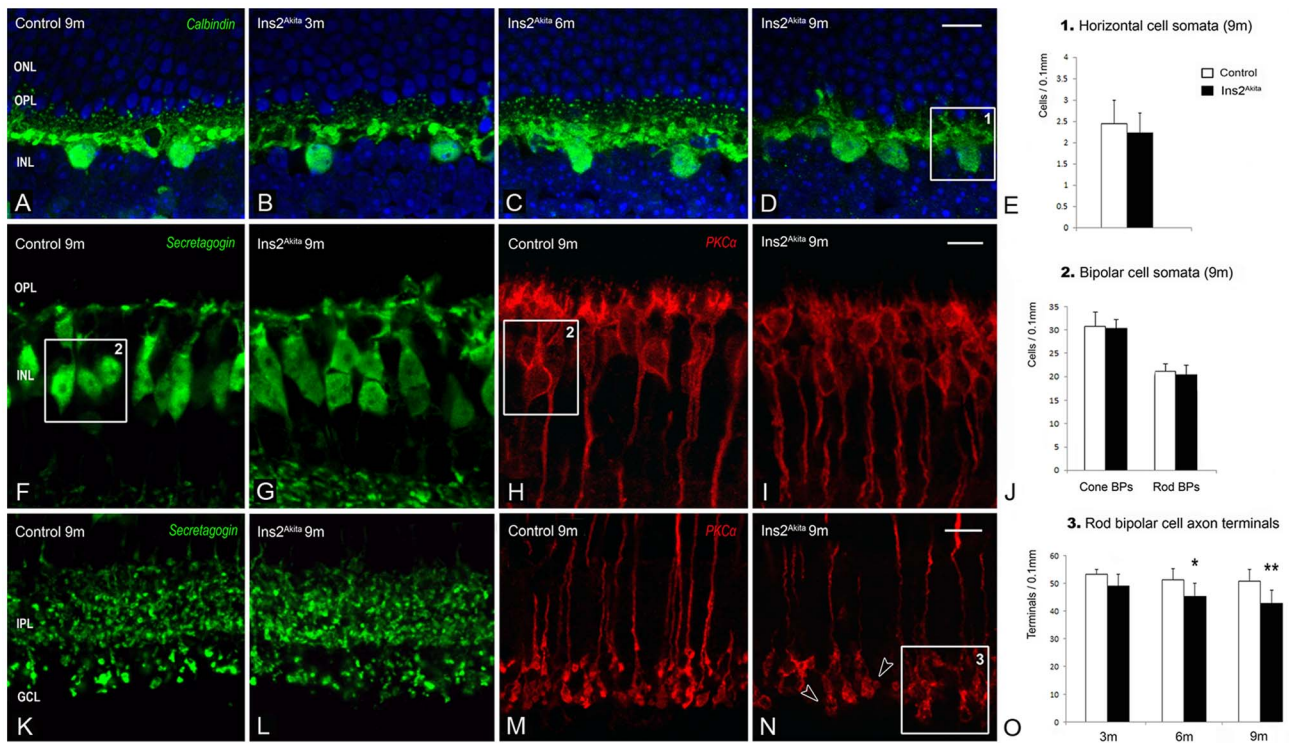

**Figure 6. Second-order neuron changes in the *Ins2<sup>Akita</sup>* mouse.** Immunostaining and quantitative analysis of horizontal cell (*box1*) (A-E), cone-bipolar (*box2*) (F-G, J) and rod-bipolar (*box3*) (H-I, J) cell somata in control and *Ins2<sup>Akita</sup>* mice at 9 months of age. (K-L) Cone-bipolar cell axon terminals in 9 month-old control and *Ins2<sup>Akita</sup>* mice. (M-O) Immunostaining and quantitative analysis of rod-bipolar cell axon terminals (*box3*) in control and *Ins2<sup>Akita</sup>* mice at different ages. Loss of rod-bipolar cell axon terminals (open arrowheads) in *Ins2<sup>Akita</sup>* retinas. (E, J, O)  $n \geq 20$  retinal images per strain/age, \* $P < 0.05$ , \*\* $P < 0.01$ . 2-way ANOVA. ONL, outer nuclear layer; OPL, outer plexiform layer; INL, inner nuclear layer; IPL, inner plexiform layer; GCL, ganglion cell layer. Scale bar: 10  $\mu$ m. doi:10.1371/journal.pone.0097970.g006

amacrine cells between 3-month old controls and *Ins2<sup>Akita</sup>* mice (Figure 7I-J). Although the number of GABAergic amacrine cells remained similar to controls by 6 months of age, GABA immunoreactivity was increased at the IPL (Figure 7C). By 9 months, both the density of GABAergic amacrine cells and GABA immunoreactivity were reduced in *Ins2<sup>Akita</sup>* mice compared to controls (Figure 7D, 7I). The morphology of glycinergic amacrine cells remained unchanged in control and *Ins2<sup>Akita</sup>* mice of all ages (Figure 7E-F). However, there was an age-dependent reduction in the cell density in both strains of mice, although the reduction was greater in the *Ins2<sup>Akita</sup>* mouse (Figure 7J). In addition, we observed a 20% reduction in the number of Brn3a<sup>+</sup> RGCs in 9-month old *Ins2<sup>Akita</sup>* mice compared to age-matched controls ( $p < 0.05$ , Figure 7G-H, K).

## Discussion

This study provides a detailed time-course analysis of the retinal neurodegenerative changes occurring in *Ins2<sup>Akita</sup>* mice. Mild scotopic ERG abnormalities and cone photoreceptor degeneration were observed at the early stages of diabetes, followed by significant ERG defects, severe synaptic structure disruption (particularly at the OPL) and loss of amacrine cells and RGCs after long-term diabetes.

Early thinning of the neurosensory retina occurs predominantly at the outer retinal layers in *Ins2<sup>Akita</sup>* mice, whilst the inner retina progressively degenerates from 3 months onwards. Recent studies reported no changes in retinal thickness in 14–25 weeks old *Ins2<sup>Akita</sup>* mice by OCT investigation [30,31]. What causes the

discrepancy is not clear, but it may be related to different approaches in image analysis. The total retinal thickness in those studies was automatically measured between the ILM and Bruch's membrane (BM) using the Heidelberg Eye Explore system. The BM in mouse eyes is not always as clear as other retinal layers. Therefore, we used the OS as a landmark to measure the thickness manually. Our results are supported by previous studies using post-mortem histological investigations [19,32], which demonstrated significant retinal thinning by 6 months of age. The results are also supported by other data from our study, including neuronal degeneration and abnormal ERG responses.

Diabetes can promote photoreceptor degeneration. Unlike the STZ-induced diabetic rat, in which both cones and rods undergo degeneration [13,14], the *Ins2<sup>Akita</sup>* mouse only develops cone degeneration starting from 3 months and progresses further by 9 months old (which was supported by the abnormal photopic ERG responses observed in this study (Figure S1D) as well as in previous studies [20,33]). The lack of significant changes in photopic ERG in 3 months old *Ins2<sup>Akita</sup>* mice (compared to a significant loss of cone photoreceptors at this stage) may suggest that the traditional white-flash ERG is not sensitive enough to detect this level of neurodegeneration. The absence of significant anomalies in rod photoreceptors together with the large rod/cone ratio (~30:1) in the mouse retina [34,35] may explain the relatively minor changes in scotopic a-wave amplitudes occurring in *Ins2<sup>Akita</sup>* mice. Cone dysfunctions, including abnormal photopic ERG [36] and impaired color vision sensitivities [12,37] have been observed in early stages of human diabetes (before the development of clinically detectable DR). In this regard, the *Ins2<sup>Akita</sup>* mouse is



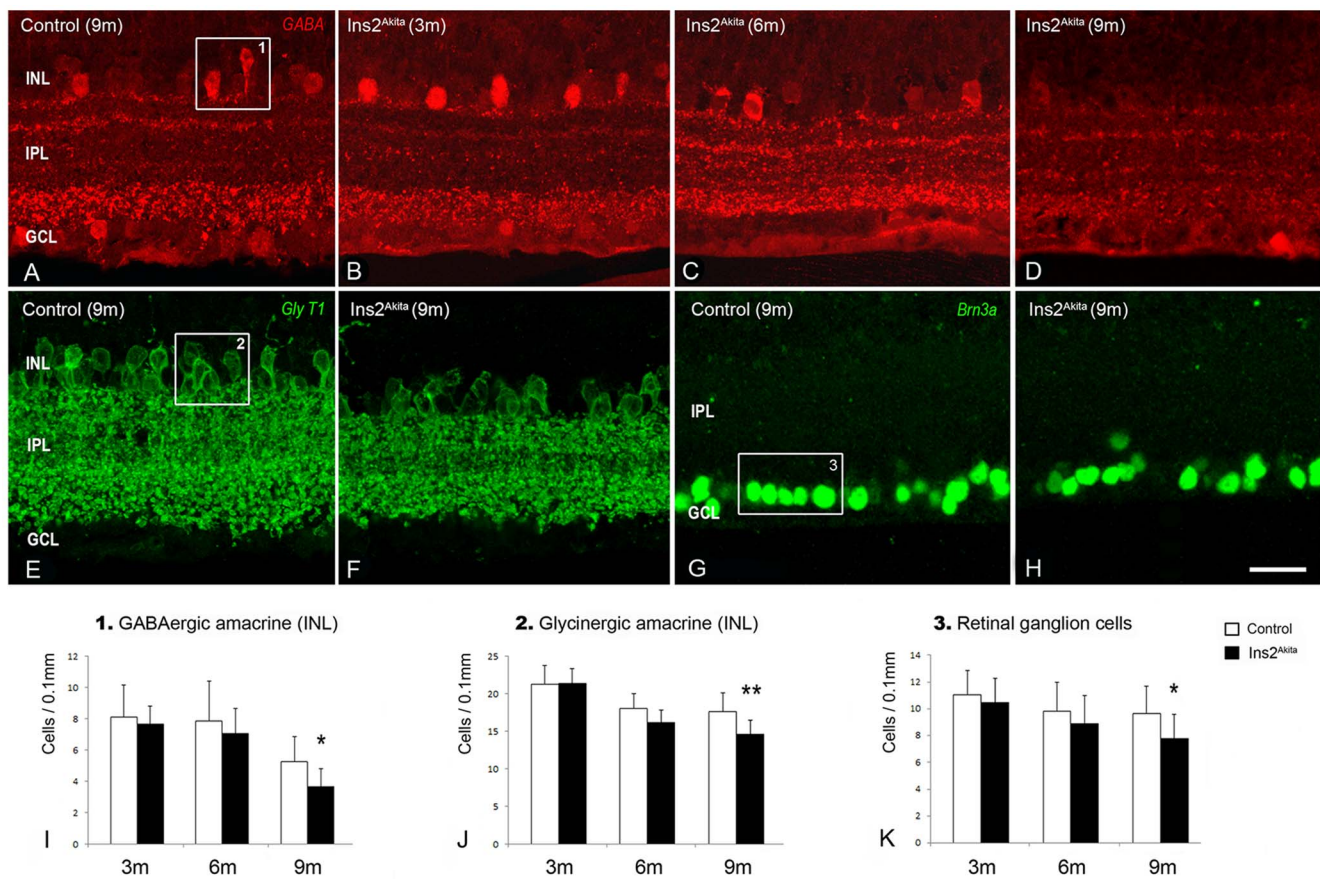

**Figure 7. Amacrine and retinal ganglion cell loss in the *Ins2<sup>Akita</sup>* mouse.** Inner retina photomicrographs of GABA (A–D), GlyT1 (E, F) or Brn3a immunoreactivities (G, H) in 9-month old control and 3-, 6- and 9-month old *Ins2<sup>Akita</sup>* mice. Quantitative analysis of INL-GABAergic amacrine cells (*box1*) (I), INL-glycinergic amacrine cells (*box2*) (J) and retinal ganglion cells (*box3*) (K) in control and *Ins2<sup>Akita</sup>* mice at different ages. (I–K)  $n \geq 20$  retinal images per strain/age, \* $P < 0.05$ , \*\* $P < 0.01$ . 2-way ANOVA. INL, inner nuclear layer; IPL, inner plexiform layer; GCL, ganglion cell layer. Scale bar: 20  $\mu\text{m}$ . doi:10.1371/journal.pone.0097970.g007

an excellent model that recapitulates this early neuropathological feature of human DR. Why cone photoreceptors selectively degenerate in the diabetic retina remains elusive. A previous study has shown that cone but not rod metabolism is enhanced with increasing glucose levels in diabetes [38], which may result in excessive oxidative stress to the cells.

Another important observation of this study is the disruption of synaptic structures at the OPL after long-term diabetes, in particular those related to postsynaptic second-order neurons. This is supported by functional ERG changes (significant reduction of the b/a wave ratio) and greater depletion of postsynaptic dendrites compared to presynaptic ribbons. It should be pointed out that the reduced immunoreactivity of calbindin and  $\text{PKC}\alpha$  at the OPL is likely due to the loss of dendritic and synaptic structures rather than the lack of protein expression, as calbindin and  $\text{PKC}\alpha$  proteins were detected at high levels in other compartments of horizontal and rod-bipolar cells. Further study using immuno-electron microscopy may help to confirm this. Our results suggest that long-term diabetes can damage synaptic connectivity in the OPL, by preferentially affecting synaptic structures in second-order neurons. Previous studies have observed diverse OPL anomalies in the diabetic eye, although the majority of these are related to photoreceptor presynaptic structures. For example, down-regulation of photoreceptor presynaptic proteins has been observed in rodent models of diabetes [15,39], whilst

mitochondria degeneration was reported in OPL-terminals of photoreceptors and second-order neurons of STZ-diabetic rats [13]. Gao et al. [40] reported a reduction in OPL thickness and OCT-reflectance in patients with mild DR. It has been proposed that the collapse of synaptic structures may be related to the generation of reactive oxygen species [41,15], a condition that is particularly aggravated in 9-month old *Ins2<sup>Akita</sup>* mice [33]. Furthermore, previous studies have shown that hyperglycemic stress can also impair synaptic function in the nervous system [42,43]. The disruption of retinal synaptic structure in the OPL may be related to the toxic effect of hyperglycemia and oxidative stress to second-order neurons.

DR related retinal neuropathy has previously been linked to the degeneration and dysfunction of inner retinal neurons, including amacrine cells and RGCs [17,19,44]. We detected a significant reduction of amacrine cells and RGCs in 9 months old *Ins2<sup>Akita</sup>*. Previous studies by Gastinger et al. [17,18] reported a loss of cholinergic and dopaminergic amacrine cells in 6 months old *Ins2<sup>Akita</sup>* and a significant degeneration of RGCs in the peripheral retina after 3 months of diabetes. The discrepancy may be related to different immunohistochemical approaches (retinal flatmount versus retinal section) and different cell markers used for morphometry. In the current study, the changes in GABA<sup>+</sup> amacrine cells in *Ins2<sup>Akita</sup>* mice correlate to OPs electrophysiological responses. OPs are known to be a useful tool for evaluating

inner retinal activity, particularly amacrine cells [45,46], and has been used as a reliable parameter to predict the progression of DR [47]. We reported increased OPs responses in Ins2<sup>Akita</sup> mice by 6 months of age. The enhanced OPs may be related to abnormal expression of GABA in the IPL. A similar change was reported in STZ-diabetic female rats [10]. The turnover of GABA and GABA<sub>A</sub> receptors is impaired in the diabetic retina [10,48], and therefore, GABAergic signalling may be compromised. By 9 months of age, amacrine cells were significantly depleted and OPs substantially attenuated.

In summary, we show for the first time that in addition to inner retinal neuronal degeneration, the Ins2<sup>Akita</sup> mouse presents a variety of retinal neuropathies that are relevant to visual dysfunction in human diabetic patients, including the early reduction of cone photoreceptors, and the disruption of synaptic structures in photoreceptors and second-order neurons. Our findings strongly suggest that the Ins2<sup>Akita</sup> mouse is a good model for studying diabetic retinal neuropathy.

## Supporting Information

**Figure S1 Scotopic Oscillatory potential (OPs) and photopic b-wave responses in the Ins2<sup>Akita</sup> mouse.** (A, B) Representative OPs responses obtained from 6-month (A) and 9-month old (B), control (black) and Ins2<sup>Akita</sup> (orange) mice. The 6

individual OPs wavelets are enumerated. (C, D) The amplitude ( $\mu$ V) of the photopic b-wave in control and Ins2<sup>Akita</sup> mice at 3 (C) and 9 months (D) of age. (C-D)  $n = 5$  mice per strain/age,  $**P < 0.01$ . 2-way ANOVA.

(TIF)

**Figure S2 Dendritic projections of rod-bipolar and cone-bipolar cells in control and Ins2<sup>Akita</sup> mice.** Confocal photomicrographs of vertical retinal sections processed for PKC $\alpha$  (A-F) or secretogin immunoreactivity (G-L) in control and Ins2<sup>Akita</sup> retinas at 3, 6 and 9 months of age. Control retinas present an age-dependent increment in the length of cone- and rod-bipolar dendritic projections. OPL, outer plexiform layer; INL, inner nuclear layer. Scale bar: 10  $\mu$ m.

(TIF)

## Acknowledgments

The authors are grateful to Dr Timothy Curtis for critically reading the manuscript.

## Author Contributions

Conceived and designed the experiments: JRH MC HX. Performed the experiments: JRH RGP. Analyzed the data: JRH RGP. Contributed reagents/materials/analysis tools: JRH MC RGP. Wrote the paper: JRH HX.

## References

- Klein BE (2007) Overview of epidemiologic studies of diabetic retinopathy. *Ophthalmic Epidemiol* 14:179–83
- Lieth E, Gardner TW, Barber AJ, Antonetti DA, Penn State Retina Research Group (2000) Retinal neurodegeneration: early pathology in diabetes. *Clin Experiment Ophthalmol* 28:3–8
- Gardner TW, Antonetti DA, Barber AJ, LaNoue KF, Levison SW (2002) Diabetic retinopathy: more than meets the eye. *Surv Ophthalmol* 2:S253–62
- Antonetti DA, Lieth E, Barber AJ, Gardner TW (1999) Molecular mechanisms of vascular permeability in diabetic retinopathy. *Semin Ophthalmol* 14:240–8
- Leal EC, Manivannan A, Hosoya K, Terasaki T, Cunha-Vaz J, et al. (2007) Inducible nitric oxide synthase isoform is a key mediator of leukostasis and blood-retinal barrier breakdown in diabetic retinopathy. *Invest Ophthalmol Vis Sci* 48:5257–65
- Wolter JR (1961) Diabetic retinopathy. *Am J Ophthalmol* 51:1123–41
- Bloodworth JM Jr (1962) Diabetic retinopathy. *Diabetes* 11:1–22
- Barber AJ, Gardner TW, Abcouwer SF (2011) The significance of vascular and neural apoptosis to the pathology of diabetic retinopathy. *Invest Ophthalmol Vis Sci* 52:1156–63
- Barber AJ (2003) A new view of diabetic retinopathy: a neurodegenerative disease of the eye. *Prog Neuropharmacol Biol Psychiatry* 27:283–90
- Ramsey DJ, Ripps H, Qian H (2006) An electrophysiological study of retinal function in the diabetic female rat. *Invest Ophthalmol Vis Sci* 47:5116–24
- Roy MS, Gunkel RD, Podgor MJ (1986) Color vision defects in early diabetic retinopathy. *Arch Ophthalmol* 104:225–8
- Trick GL, Burde RM, Gordon MO, Santiago JV, Kilo C (1988) The relationship between hue discrimination and contrast sensitivity deficits in patients with diabetes mellitus. *Ophthalmology* 95:693–8.
- Park SH, Park JW, Park SJ, Kim KY, Chung JW, et al. (2003) Apoptotic death of photoreceptors in the streptozotocin-induced diabetic rat retina. *Diabetologia* 46:1260–8.
- Szabadfi K, Atlasz T, Kiss P, Reglodi D, Szabo, et al. (2012) Protective effects of the neuropeptide PACAP in diabetic retinopathy. *Cell Tissue Res* 348:37–46
- Ozawa Y, Kurihara T, Sasaki M (2011) Neural degeneration in the retina of the streptozotocin-induced type 1 diabetes model. *Exp Diabetes Res* 2011:108328
- Preet A, Siddiqui MR, Taha A, Badhai J, Hussain ME, et al. (2006) Long-term effect of *Trigonella foenum graecum* and its combination with sodium orthovanadate in preventing histopathological and biochemical abnormalities in diabetic rat ocular tissues. *Mol Cell Biochem* 289:137–47
- Gastinger MJ, Kunselman AR, Conboy EE, Bronson SK, Barber AJ (2008) Dendrite remodeling and other abnormalities in the retinal ganglion cells of Ins2 Akita diabetic mice. *Invest Ophthalmol Vis Sci* 49:2635–42
- Gastinger MJ, Singh RS, Barber AJ (2006) Loss of cholinergic and dopaminergic amacrine cells in streptozotocin-diabetic rat and Ins2Akita-diabetic mouse retinas. *Invest Ophthalmol Vis Sci* 47:3143–50
- Barber AJ, Antonetti DA, Kern TS, Reiter CE, Soans RS, et al. (2005) The Ins2Akita mouse as a model of early retinal complications in diabetes. *Invest Ophthalmol Vis Sci* 46:2210–8
- Han Z, Guo J, Conley SM, Naash MI (2013) Retinal angiogenesis in the Ins2 (Akita) mouse model of diabetic retinopathy. *Invest Ophthalmol Vis Sci* 54:574–84
- Yoshioka M, Kayo T, Ikeda T, Koizumi A (1997) A novel locus, *Mody4*, distal to D7Mit189 on chromosome 7 determines early-onset NIDDM in nonobese C57BL/6 (Akita) mutant mice. *Diabetes* 46:887–94
- Paques M, Guyomard JL, Simonutti M, Roux MJ, Picaud S, et al. (2007) Panretinal, high-resolution color photography of the mouse fundus. *Invest Ophthalmol Vis Sci* 48:2769–74.
- Xu H, Koch P, Chen M, Lau A, Reid DM, et al. (2008) A clinical grading system for retinal inflammation in the chronic model of experimental autoimmune uveoretinitis using digital fundus images. *Exp Eye Res* 87:319–26
- Hombrebueno JR, Luo C, Guo L, Chen M, Xu H (2014) Intravitreal Injection of Normal Saline Induces Retinal Degeneration in the C57BL/6J Mouse. *Trans Vis Sci Tech* 3:3
- Knott EJ, Sheets KG, Zhou Y, Gordon WC, Bazan NG (2011) Spatial correlation of mouse photoreceptor-RPE thickness between SD-OCT and histology. *Exp Eye Res* 92:155–60
- Hombrebueno JR, Tsai MM, Kim HL, De Juan J, Grzywacz NM, et al. (2010) Morphological changes of short-wavelength cones in the developing S334ter-3 transgenic rat. *Brain Res* 1321:60–6
- Chen M, Hombrebueno JR, Luo C, Penalva R, Zhao J, et al. (2013) Age- and light-dependent development of localised retinal atrophy in *CCL2(-/-)* *CX3CR1(GFP/GFP)* mice. *PLoS One* 8:e61381
- Vaney DI, Young HM (1988) GABA-like immunoreactivity in cholinergic amacrine cells of the rabbit retina. *Brain Res* 438:369–73
- Rice DS, Curran T (2000) Disabled-1 is expressed in type AII amacrine cells in the mouse retina. *J Comp Neurol* 424:327–38
- Vagaja NN, Binz N, McLenachan S, Rakoczy EP, McMenamin PG (2013) Influence of endotoxin-mediated retinal inflammation on phenotype of diabetic retinopathy in Ins2 Akita mice. *Br J Ophthalmol* 97:1343–50
- McLenachan S, Chen X, McMenamin PG, Rakoczy EP (2013) Absence of clinical correlates of diabetic retinopathy in the Ins2Akita retina. *Clin Experiment Ophthalmol* 41:582–92
- Smith SB, Duplantier J, Dun Y, Mysona B, Roon P, et al. (2008) In vivo protection against retinal neurodegeneration by sigma receptor 1 ligand (+)-pentazocine. *Invest Ophthalmol Vis Sci* 49:4154–61
- Murray AR, Chen Q, Takahashi Y, Zhou KK, Park K, et al. (2013) MicroRNA-200b downregulates oxidation resistance 1 (*Oxr1*) expression in the retina of type 1 diabetes model. *Invest Ophthalmol Vis Sci* 54:1689–97
- Carter-Dawson LD, LaVail MM (1979) Rods and cones in the mouse retina. I. Structural analysis using light and electron microscopy. *J Comp Neurol* 188:245–62
- Carter-Dawson LD, LaVail MM (1979) Rods and cones in the mouse retina. II. Autoradiographic analysis of cell generation using tritiated thymidine. *J Comp Neurol* 188:263–72

36. Chen H, Zhang M, Huang S, Wu D (2008) The photopic negative response of flash ERG in nonproliferative diabetic retinopathy. *Doc Ophthalmol* 117:129–35
37. Tregear SJ, Knowles PJ, Ripley LG, Casswell AG (1997) Chromatic-contrast threshold impairment in diabetes. *Eye (Lond)* 11:537–46.
38. Kurtenbach A, Maysner HM, Jägle H, Fritsche A, Zrenner E (2006) Hyperoxia, hyperglycemia, and photoreceptor sensitivity in normal and diabetic subjects. *Vis Neurosci* 23:651–61
39. VanGuilder HD, Brucklacher RM, Patel K, Ellis RW, Freeman WM, et al. (2008) Diabetes downregulates presynaptic proteins and reduces basal synapsin I phosphorylation in rat retina. *Eur J Neurosci* 28:1–11
40. Gao W, Tátrai E, Ólvedy V, Varga B, Laurik L, et al. (2011) Investigation of changes in thickness and reflectivity from layered retinal structures of healthy and diabetic eyes with optical coherence tomography. *J Biomed Sci Eng* 4:657–665
41. Kowluru RA, Chan PS (2007) Oxidative stress and diabetic retinopathy. *Exp Diabetes Res* 2007:43603
42. Kamal A, Biessels GJ, Ramakers GM, Hendrik Gispen W (2005) The effect of short duration streptozotocin-induced diabetes mellitus on the late phase and threshold of long-term potentiation induction in the rat. *Brain Res* 1053:126–30
43. Yamato T, Misumi Y, Yamasaki S, Kino M, Aomine M (2004) Diabetes mellitus decreases hippocampal release of neurotransmitters: an in vivo microdialysis study of awake, freely moving rats. *Diabetes Nutr Metab* 17:128–36
44. Seki M, Tanaka T, Nawa H, Usui T, Fukuchi T, et al. (2004) Involvement of brain-derived neurotrophic factor in early retinal neuropathy of streptozotocin-induced diabetes in rats: therapeutic potential of brain-derived neurotrophic factor for dopaminergic amacrine cells. *Diabetes* 53:2412–9
45. Wachtmeister L, Dowling JE (1978) The oscillatory potentials of the mudpuppy retina. *Invest Ophthalmol Vis Sci* 17:1176–88
46. Wachtmeister L (1998) Oscillatory potentials in the retina: what do they reveal. *Prog Retin Eye Res* 17:485–521
47. Tzekov R, Arden GB (1999) The electroretinogram in diabetic retinopathy. *Surv Ophthalmol* 44:53–60.
48. Ishikawa A, Ishiguro S, Tamai M (1996) Changes in GABA metabolism in streptozotocin-induced diabetic rat retinas. *Curr Eye Res* 15:63–71.
